# Supplementary material for: Experiences with an integrated screening programme targeted at women who had a hypertensive disorder or diabetes in pregnancy in the Netherlands: a qualitative study
Source: PubMed Central journal article supplement — BMJ Open. 2023 Aug 17;13(8):e066198. doi: 10.1136/bmjopen-2022-066198 (PMC10441084; doi:10.1136/bmjopen-2022-066198), 2023-08-17
Supplement: bmjopen-2022-066198supp002.pdf [file bmjopen-2022-066198supp002.pdf]

**Dossiernummer 8223-21445**

**Hart voor Vrouwen in Den Haag**

---

# **Hart voor Vrouwen in Den Haag (maart 2020)**

Dossiernummer 8223-21445

Hart voor Vrouwen in Den Haag

## PROTOCOL TITLE Hart voor Vrouwen

|                                                                           |                                                                                                                                     |
|---------------------------------------------------------------------------|-------------------------------------------------------------------------------------------------------------------------------------|
| <b>Protocol ID</b>                                                        | <b>8223-21445</b>                                                                                                                   |
| <b>Short title</b>                                                        | <b>Hart voor Vrouwen in Den Haag</b>                                                                                                |
| <b>Version</b>                                                            | <b>1.0</b>                                                                                                                          |
| <b>Date</b>                                                               | <b>Juni 2020</b>                                                                                                                    |
| <b>Coordinating investigator/project leader</b>                           | <i>Dr. R.C. Vos, assistant professor en programmamanager onderzoek LUMC Campus Den Haag</i>                                         |
| <b>Principal investigator(s) (in Dutch: hoofdonderzoeker/ uitvoerder)</b> | <i>Dr. H.M.M. Vos, Hoofd Huisartsenopleiding LUMC en huisarts</i>                                                                   |
| <i>Locale hoofdonderzoeker HADOKS</i>                                     | <i>Drs. B. Veen-Reedijk MD, kaderarts Hart- en Vaatziekten</i>                                                                      |
| <i>Lokale hoofdonderzoeker HagaZiekenhuis</i>                             | <i>Drs. M.E. van Hoorn MD, Gynaecoloog-perinatoloog</i>                                                                             |
| <i>Locale hoofdonderzoeker HMC</i>                                        | <i>Drs. E.G.M. Olde Bijvank MD, cardioloog</i>                                                                                      |
| <b>Sponsor (in Dutch: verrichter/opdrachtgever)</b>                       | <i>LUMC</i>                                                                                                                         |
| <b>Subsidising party</b>                                                  | <i>ZonMw</i>                                                                                                                        |
| <b>Independent expert (s)</b>                                             | <i>Jeanine Roeters van Lennep, internist vasculaire geneeskunde</i><br><i>Erasmus Medisch Centrum, afdeling Interne Geneeskunde</i> |

Dossiernummer 8223-21445

Hart voor Vrouwen in Den Haag

**PROTOCOL SIGNATURE SHEET**

| <b>Name</b>                                                                                                                 | <b>Signature</b> | <b>Date</b> |
|-----------------------------------------------------------------------------------------------------------------------------|------------------|-------------|
| <b>Head of Department:<br/>Prof. M.E. Numans, Professor<br/>Huisartsgeneeskunde</b>                                         |                  |             |
| <b>Coordinating Investigator/Project<br/>leader<br/>Dr. R.C. Vos, assistant professor en<br/>programmamanager onderzoek</b> |                  |             |
| <b>Principal Investigator]:<br/>Dr. H.M.M. Vos, <i>Hoofd<br/>Huisartsenopleiding LUMC en huisarts</i></b>                   |                  |             |

**Dossiernummer 8223-21445****Hart voor Vrouwen in Den Haag****TABLE OF CONTENTS**

|                                                            |    |
|------------------------------------------------------------|----|
| 1. INLEIDING.....                                          | 8  |
| 2. DOELSTELLINGEN.....                                     | 10 |
| 3. STUDIE DESIGN.....                                      | 12 |
| 4. STUDY POPULATION.....                                   | 13 |
| 4.1 Populatie.....                                         | 13 |
| 4.2 Sample size berekening.....                            | 13 |
| 5. Implementatie project.....                              | 14 |
| 6. METHODS.....                                            | 17 |
| 6.1 Studie parameters/uitkomstmaten.....                   | 17 |
| 6.1.1 Primaire uitkomstmaat.....                           | 17 |
| 6.1.2 Secondaire studie parameters/uitkomstmaten.....      | 17 |
| 6.2 Studie procedures.....                                 | 17 |
| 7. STATISTICAL ANALYSIS.....                               | 19 |
| 7.1 Deelproject A: semi-gestructureerde interviews.....    | 19 |
| 7.2 Deelproject B: Risico stratificatie.....               | 19 |
| 8. ETHICAL CONSIDERATIONS.....                             | 20 |
| 8.1 Regulation statement.....                              | 20 |
| 8.2 Recruitment en consent.....                            | 20 |
| 9. ADMINISTRATIVE ASPECTS, MONITORING AND PUBLICATION..... | 21 |
| 9.1 Handling and storage of data and documents.....        | 21 |
| 9.2 Amendments.....                                        | 21 |
| 9.3 Public disclosure and publication policy.....          | 21 |
| 10. REFERENCES.....                                        | 22 |

**Dossiernummer 8223-21445****Hart voor Vrouwen in Den Haag****LIST OF ABBREVIATIONS AND RELEVANT DEFINITIONS**

|             |                                          |
|-------------|------------------------------------------|
| <b>BMI</b>  | <b>Body Mass Index</b>                   |
| <b>CVRM</b> | <b>Cardiovasculair Risico Management</b> |
| <b>DMII</b> | <b>Diabetes Mellitus II</b>              |
| <b>HVZ</b>  | <b>Hart- en Vaatziekten</b>              |
| <b>RIN</b>  | <b>Random identificatienummer</b>        |
| <b>RR</b>   | <b>Relatief Risico</b>                   |
| <b>SES</b>  | <b>SociaalEconomische Status</b>         |

## SAMENVATTING

**Rationale:** Pre-eclampsie komt voor als zwangerschapscomplicatie bij ongeveer 5-8% van alle zwangerschappen. Vrouwen die tijdens hun zwangerschap pre-eclampsie hebben gehad, hebben op lange termijn een twee keer verhoogd risico op hart- en vaatziekten (HVZ). De prevalentie van diabetes gravidarum in Nederland wordt geschat op 2 tot 5%. Vrouwen met diabetes gravidarum hebben een verhoogd risico op het ontwikkelen van diabetes type 2 in de toekomst. Dit risico kan oplopen tot ongeveer 50%. Als vrouwen deze aandoeningen hebben gehad, dan is het lifetime risico op HVZ hoger. Vrouwen met deze (doorgemaakte) hypertensieve aandoeningen in de zwangerschap, moeten daarom na de zwangerschap blijvend gecontroleerd worden op aanvullende risicofactoren op HVZ (zoals BMI, hypertensie, hypercholesterolemie, roken, ongezonde leefstijl) om op tijd het risico op HVZ te kunnen verlagen.

**Doelstellingen:** Dit project bestaat uit twee te implementeren deelprojecten, namelijk A. Een integraal zorg- en preventie aanbod voor vrouwen die gedurende de looptijd van het implementatieproject in beeld komen vanwege zwangerschapshypertensie, pre-eclampsie of diabetes gravidarum en na hun bevalling deze integrale zorg en preventie aangeboden krijgen, en B. Het proactief opsporen van vrouwen die vanwege hun voorgeschiedenis (in het verleden hypertensieve aandoeningen in de zwangerschap of zwangerschapsdiabetes) in aanmerking komen voor een integraal zorg- en preventie aanbod.

**Studie design:** implementatie onderzoek binnen het regionaal initiatief Haagse Vaten. Het doel van Haagse Vaten is het maken van goede afspraken over de juiste zorgverlening op de juiste plek waardoor de zorg voor mensen met (risico op) hart- en vaatziekten beter wordt, de ervaren gezondheid toeneemt en kosten beheersbaar blijven. Haagse Vaten is een initiatief van artsen in de regio om de zorg goed af te stemmen: wanneer verwijzen we een patiënt naar het ziekenhuis en vooral ook: wanneer verwijzen we een patiënt terug naar zijn of haar eigen huisarts voor de verdere zorg. De ambitie is op middellange termijn een verschil te maken in de ziektelast en sterfte door hart- en vaatziekten. Dit wordt bereikt door het maken van goede werkafspraken, regelmatige scholingen en intensieve samenwerking tussen alle eerste- en tweedelijns zorgorganisaties in Den Haag en andere relevante partijen zoals de Gemeente, GGD, universiteit (LUMC) en patiënten vertegenwoordiging (Harteraad).

**Doelgroep:** In het kader van Haagse Vaten is een project vastgesteld dat zich richt op de preventie van HVZ bij vrouwen met zwangerschapshypertensie, pre-eclampsie en diabetes gravidarum in de voorgeschiedenis.

**Implementatie project:** De zorg voor vrouwen met een verhoogd risico op HVZ dient op een proactieve manier vorm georganiseerd te worden. Dit om te zorgen dat er follow up gegeven wordt aan vrouwen van wie bekend is dat zij een verhoogd risico hebben op HVZ.

Voorkomen moet worden dat de vrouw pas in beeld komt als er al schade aan hart, bloedvaten en/of nieren is opgetreden en er dus geen sprake meer is van preventie van HVZ. Het risico op HVZ is bij deze jonge vrouwen aanvankelijk laag maar neemt toe naarmate zij ouder worden. Hier ligt de unieke kans om deze periode te benutten voor het optimaliseren van hun "cardiovasculaire gezondheid" en preventie van cardiovasculaire risicofactoren. Het risico op HVZ wordt namelijk in hoge mate bepaald door leefstijl factoren die in principe te veranderen zijn.

**Dossiernummer 8223-21445****Hart voor Vrouwen in Den Haag**

**Trefwoorden:** Preventie, pre-eclampsie, zwangerschapshypertensie, diabetes gravidarum, leefstijl, eerste lijn, tweede lijn, samenwerking, integrale zorg, de juiste zorg op de juiste plek, patiëntparticipatie

## 1. INLEIDING

Vrouwen met een medische voorgeschiedenis van hypertensieve aandoeningen in de zwangerschap krijgen vaker hypertensie, diabetes mellitus type II (DMII) en een hypercholesterolemie in vergelijking met vrouwen die een ongecompliceerde zwangerschap hadden. Het risico op hart en vaatziekten (HVZ) is bij jonge vrouwen aanvankelijk laag maar neemt toe naarmate zij ouder worden. Van de vrouwen met diabetes gravidarum krijgt uiteindelijk ongeveer de helft DMII, afhankelijk van de leefstijl.

Zwangerschapsgelateerde hypertensie komt voor bij 10 tot 15% van alle zwangerschappen. Het risico op het ontwikkelen van latere HVZ is verhoogd (RR 1,9 – 2,5) (Lykke, Paediatr Perinat Epidemiol 2010). Ook het risico op blijvende hypertensie of hypertensie in de toekomst is verhoogd (Wilson, BMJ 2003). Mogelijk is na zwangerschapsgelateerde hypertensie ook het risico op DMII verhoogd.

Pre-eclampsie komt voor als zwangerschapscomplicatie bij ongeveer 5-8% van alle zwangerschappen en is wereldwijd de belangrijkste oorzaak voor maternale mortaliteit (Stegers, Lancet 2010). Vrouwen die tijdens hun zwangerschap pre-eclampsie hebben gehad hebben op lange termijn een twee keer verhoogd risico op HVZ (RR 2.16 95%CI 1.86-2.52) (Bellamy, BMJ 2007). Het risico op HVZ is zelfs nog hoger in subgroepen met ernstige pre-eclampsie (RR 2.86 95%CI 2.25-3.65) of pre-eclampsie <37 weken (RR 7,71, 95%CI 4.4-13.52). Het risico op DMII na pre-eclampsie is ongeveer twee keer zo hoog als bij vrouwen die geen pre-eclampsie hebben doorgemaakt (Engeland, Eur J Epidemiol. 2011).

De prevalentie van diabetes gravidarum in Nederland wordt geschat op 2 tot 5%. De toename van het aantal zwangerschappen dat gecompliceerd wordt door diabetes gravidarum wordt onder andere veroorzaakt door veranderingen in levensstijl en de daarmee gepaard gaande toename in de prevalentie van overgewicht en obesitas. Diabetes gravidarum en mildere vormen van hyperglykemie in de zwangerschap leiden tot een verhoogde kans op complicaties in de zwangerschap. Vrouwen met diabetes gravidarum hebben een verhoogd risico op het ontwikkelen van DMII in de toekomst. Dit risico kan oplopen tot ongeveer 50% in de eerste vijf jaar na de zwangerschap (van Leeuwen. NTVG. 2011).

Verschillende richtlijnen adviseren om te screenen op HVZ en DMII na hypertensieve aandoeningen in de zwangerschap en diabetes gravidarum. Toch wordt deze groep nog niet structureel actief opgeroepen voor screeningsprogramma's in de eerste lijn, zoals de programmatische ketenzorgprogramma's op het gebied van Cardiovasculair Risicomanagement (CVRM). In de zeer recent herziene multidisciplinaire richtlijn CVRM wordt aanbevolen om vrouwen met diabetes gravidarum in de voorgeschiedenis periodieke te screenen op DMII en om vrouwen met in de voorgeschiedenis pre-eclampsie en/of zwangerschapshypertensie periodiek te screenen op hoge bloeddruk en DMII (Multidisciplinaire richtlijn Cardiovasculair risicomanagement 2019). Dit is een forse aanpassing op de vorige NHG-standaard CVRM, waarin dit advies pas gegeven werd bij vrouwen na hun 50<sup>e</sup> levensjaar. Het feit dat dit leeftijds criterium losgelaten is geeft aan dat de relevantie van eerder te screenen op risicofactoren voor HVZ groot is.

Ook de richtlijn Diabetes mellitus en Zwangerschap van de NVOG uit 2018 geeft aan om na een diabetes gravidarum jaarlijks te screenen op DMII (Richtlijn Diabetes mellitus en Zwangerschap versie 3.0 NVOG 2018).



**Dossiernummer 8223-21445****Hart voor Vrouwen in Den Haag**

Bij de vrouwen met hypertensieve aandoeningen in de zwangerschap en/of diabetes gravidarum is er sprake van inzicht in hun cardiovasculaire toekomst en dit is bij uitstek een groep waarbij HVZ vroeg voorspeld kunnen worden, mogelijk voorkomen kunnen worden of in een vroeger stadium behandeld kunnen worden met minder schade tot gevolg. Op deze manier kan de juiste zorg op de juiste plek geleverd worden.

Omdat in dit project met behulp van data risico stratificatie toegepast wordt voor vrouwen met zwangerschapscomplicaties op basis van morbiditeit, leeftijd, etniciteit, sociaaleconomische status (SES) en zo dus gekeken kan worden welke groepen het hoogste risico lopen en vanaf welke leeftijd komen we een stapje dichterbij het op individueel niveau kunnen voorspellen van het risico op HVZ.

In een eerste inventarisatie Gender en Preventie van ZonMW wordt in 2018 na inventarisatie bij diverse stakeholders geconcludeerd dat oudere vrouwen, vrouwen die complicaties hebben gehad tijdens de zwangerschap en vrouwen met diabetes en migraine doelgroepen zijn die extra aandacht vragen gezien hun verhoogde kans op HVZ. Adequate screeningsmethoden en een toegesneden aanbod van preventieve interventies zijn voor deze doelgroepen nodig (Gender en preventie. Een eerste inventarisatie 2018).

Deze wetenschappelijke kennis en kennis op basis waarvan de meest recente richtlijn CVRM is aangepast wachten op implementatie in de praktijk. Hier ligt de unieke kans om de periode na de zwangerschap en voordat HVZ en/of DMII optreden te benutten voor het optimaliseren van hun "cardiovasculaire gezondheid" en preventie van cardiovasculaire risicofactoren. Het risico op HVZ wordt namelijk in hoge mate bepaald door (leefstijl) factoren die in principe te veranderen zijn, zoals roken, gezonde voeding, overgewicht en onvoldoende beweging. Een gecoördineerde implementatie van deze kennis in de regio kan bij deze groep het risico op HVZ helpen verlagen. Het doel van het huidig onderzoek is de procesevaluatie van de regionale implementatie en bestaat uit twee onderdelen; 1) het identificeren van vrouwen met een hoog risico op basis van routine zorg data (dit valt onder het project Haagse Vaten, protocol G18.070) en 2) de procesevaluatie van het implementatie traject.

## 2. DOELSTELLINGEN

Het doel is om vroegtijdig cardiovasculaire risicofactoren in kaart te brengen bij vrouwen die een hypertensieve aandoening in de zwangerschap (zwangerschapshypertensie en pre-eclampsie) en diabetes gravidarum hebben doorgemaakt om zo de preventie van HVZ te optimaliseren. Daarnaast is het doel om met regionale afspraken en een data infrastructuur de cardiovasculaire zorg voor deze vrouwen vorm te geven in de regio Den Haag binnen het project Haagse Vaten. Doel van Haagse Vaten is het maken van goede afspraken over de juiste zorgverlening op de juiste plek waardoor de zorg voor mensen met (risico op) HVZ beter en betaalbaarder wordt en de ervaren gezondheid toeneemt. Haagse Vaten is een initiatief van artsen in de regio om de zorg goed af te stemmen: wanneer verwijzen we een patiënt naar het ziekenhuis en vooral ook: wanneer verwijzen we een patiënt terug naar zijn of haar eigen huisarts voor de verdere zorg. De ambitie is op middellange termijn een verschil te maken in de ziektelast en sterfte door HVZ. Dit wordt bereikt door het maken van goede werkafspraken, regelmatige scholingen en intensieve samenwerking tussen alle eerste- en tweedelijns zorgorganisaties in Den Haag en andere relevante partijen zoals de Gemeente, GGD, universiteit (LUMC) en patiënten vertegenwoordiging (Harteraad).

### Primair Doel

Het doel is om het implementatieproces te evalueren van de regionale samenwerking om vroegtijdig cardiovasculaire risicofactoren in kaart te brengen: na de zwangerschap en niet pas op 45 jarige leeftijd zoals nu in de multidisciplinaire standaard staat. Dit door een goede overdracht van het ziekenhuis (gynaecoloog/internist/cardioloog) of de verloskundige naar de huisartsenpraktijk. Vervolgens worden de vrouwen periodiek gecontroleerd in de huisartsenpraktijk op risicofactoren.

### Secundaire doelen

- met regionale afspraken en een data infrastructuur de cardiovasculaire zorg voor deze vrouwen vorm geven in de regio Haaglanden binnen het project Haagse Vaten door:
  - Een inventarisatie hoe de nieuwe aanpak ervaren wordt door zorgprofessionals en vrouwen die gedurende de looptijd van het implementatieproject in beeld komen vanwege zwangerschapshypertensie, pre-eclampsie en/of diabetes gravidarum na hun bevalling een integraal zorg- en preventie aanbod aan te bieden
  - Het opsporen van vrouwen die vanwege hun voorgeschiedenis (in het verleden een hypertensieve aandoening in de zwangerschap of zwangerschapsdiabetes) in aanmerking komen voor een integraal zorg- en preventie aanbod.
  - Risico stratificatie op basis van routine gegevens, waardoor passende zorg bepaald kan worden voor verschillende groepen, zoals verschillen in SES, etniciteit en leeftijd. Hierbij zal gekeken worden naar de toegevoegde voorspellende waarde van vrouwspecifieke en context factoren op de bestaande klassieke risico factoren.
  - Het evalueren of de vrouwen die in aanmerking komen ook daadwerkelijk de controles in de 1<sup>e</sup> lijn ontvangen in het kader van CVRM gedurende de eerste vijf jaar post partum jaarlijks. Daarna vindt controle één keer per drie jaar

**Dossiernummer 8223-21445****Hart voor Vrouwen in Den Haag**

plaats, totdat er redenen zijn om de controles weer frequenter uit te voeren vanwege een verhoogde bloeddruk of andere risicofactoren.

**Dossiernummer 8223-21445****Hart voor Vrouwen in Den Haag**

---

**3. STUDIE DESIGN**

Een observationele studie, waarbij gebruikt wordt gemaakt van routine zorgdata (prospectief, deelproject A; retrospectief, deelproject). Voor de procesevaluatie (ervaring en acceptatie van de nieuwe aanpak door de stakeholders) zal gebruik gemaakt worden van kwalitatieve data.

Dossiernummer 8223-21445

Hart voor Vrouwen in Den Haag

#### 4. STUDY POPULATION

##### 4.1 Populatie

Vrouwen die ooit zwangerschapshypertensie, pre-eclampsie en/of diabetes gravidarum hebben doorgemaakt. Ernstige pre-eclampsie wordt gedefinieerd volgens de ACOG criteria (zie hieronder)

| Begrip (afkorting)                                                  | Omschrijving                                                                                                                                                                                                                                                                                                                                                                                                                                                                                                                                                                                                                                                                                       |
|---------------------------------------------------------------------|----------------------------------------------------------------------------------------------------------------------------------------------------------------------------------------------------------------------------------------------------------------------------------------------------------------------------------------------------------------------------------------------------------------------------------------------------------------------------------------------------------------------------------------------------------------------------------------------------------------------------------------------------------------------------------------------------|
| Zwangerschapshypertensie                                            | Systolische bloeddruk van > 140 mmHg en/of diastolische bloeddruk > 90 mmHg na 20 weken zwangerschap, minimaal 2 maal gemeten bij een voorheen normotensieve vrouw.                                                                                                                                                                                                                                                                                                                                                                                                                                                                                                                                |
| Pre-eclampsie                                                       | Combinatie van zwangerschapshypertensie en een uitscheiding van meer dan 300 mg eiwit in de urine per 24 uur                                                                                                                                                                                                                                                                                                                                                                                                                                                                                                                                                                                       |
| Ernstige Pre-eclampsie Volgens ACOG criteria (ACOG Obstet Gyn 2002) | Ernstige pre-eclampsie $\geq 1$ criteria: <ol style="list-style-type: none"> <li>1. Diastolische bloeddruk <math>\geq 110</math> mmHg en/of systolische bloeddruk <math>\geq 160</math> mmHg op 2 tijdstippen gemeten minstens 6 uur tussen metingen</li> <li>2. Proteïnurie <math>\geq 5</math> gram/24 uurs urine of urinestick <math>\geq 3+</math> eiwit in 2 urine monsters minstens 4 uur tussen metingen</li> <li>3. Oligurie &lt;500 ml/24 uur</li> <li>4. Cerebrale of visuele stoornissen</li> <li>5. Longoedeem of cyanose</li> <li>6. Pijn epigastrio of bovenkwadrant</li> <li>7. Thrombocytopenie</li> <li>8. Leverfunctiestoornissen</li> <li>9. Foetale groeivertraging</li> </ol> |
| Diabetes gravidarum                                                 | Elke vorm van hyperglykemie die tijdens de zwangerschap wordt ontdekt, onafhankelijk van het feit of deze afwijking na de zwangerschap weer verdwijnt.                                                                                                                                                                                                                                                                                                                                                                                                                                                                                                                                             |

##### 4.2 Sample size berekening

Aan deelproject A zullen 12 huisartspraktijken gaan deelnemen, waarbij alle vrouwen die voldoen aan de inclusie criteria volgens de nieuwe aanpak behandeld zullen worden (~20). Voor deelproject B zal gebruikt gemaakt worden van de ELAN GGDH data-infrastructuur. Binnen deze data-infrastructuur is reeds data beschikbaar voor 2007-2017 van 1,1 miljoen inwoners van de regio Haaglanden, waarvan ~50% vrouw.

## 5. Implementatie project

Het project bestaat uit twee deelprojecten, namelijk:

- A. Een integraal zorg- en preventie aanbod voor vrouwen die gedurende de looptijd van het implementatieproject in beeld komen vanwege zwangerschapshypertensie, pre-eclampsie of diabetes gravidarum en na hun bevalling deze integrale zorg en preventie aangeboden krijgen, en
- B. Het opsporen van vrouwen die vanwege hun voorgeschiedenis (in het verleden zwangerschapshypertensie, pre-eclampsie of zwangerschapsdiabetes) in aanmerking komen voor een integraal zorg- en preventie aanbod.

### Deelproject A

In het kader van deelproject A (aanbod voor vrouwen die in looptijd van het project in beeld komen) worden de volgende taken onderscheiden:

1. Het verder aanscherpen van de samenwerkingsafspraken tussen de eerste en tweede lijn.
2. Het aanpassen van het Keteninformatie Systeem (KIS) voor nieuwe patiëntencategorieën die in aanmerking komen voor CVRM.
3. Samenwerkingsafspraken implementeren welke vrouwen aanvankelijk in de tweede lijn gezien worden en welke vrouwen naar de eerste lijn verwezen worden en afspraken wanneer vrouwen naar de eerste lijn verwezen worden voor CVRM.
4. Incluseren van deze vrouwen na terugverwijzing vanuit de tweede lijn in een CVRM-programma zodat de huisarts geïnformeerd wordt om welke vrouwen het gaat in het KIS en frequentie van terugzien, en care gaps (het niet navolgen/plaatsvinden van de controle afspraak) gesignaleerd worden.
5. Nagaan in hoe verre deze zorg past binnen de huidige CVRM richtlijn en wat voor (aanvullende) financiering nodig is.

### **Samenwerkingsafspraken**

#### **Follow up**

Circa 6 weken na bevalling worden patiënten teruggezien op de polikliniek gynaecologie of bij de verloskundige. Tijdens dit bezoek zal standaard anamnese, bloeddruk en aanvullend onderzoek verricht worden. Afhankelijk van de bevindingen tijdens dit consult zal besloten worden patiënten over te dragen aan de eerste lijn voor behandeling in het kader van CVRM. Indien nodig worden bevindingen besproken met een internist-vasculair geneeskundige (bijvoorbeeld in een multidisciplinair overleg of een eenmalig poliklinisch consult). Twee mogelijkheden dienen zich dan voor: 1) Overdragen aan eerste lijn met adviezen ten aanzien van cardiovasculair risicomanagement, of 2) Behandeling in 2<sup>e</sup> lijn

Dossiernummer 8223-21445

Hart voor Vrouwen in Den Haag

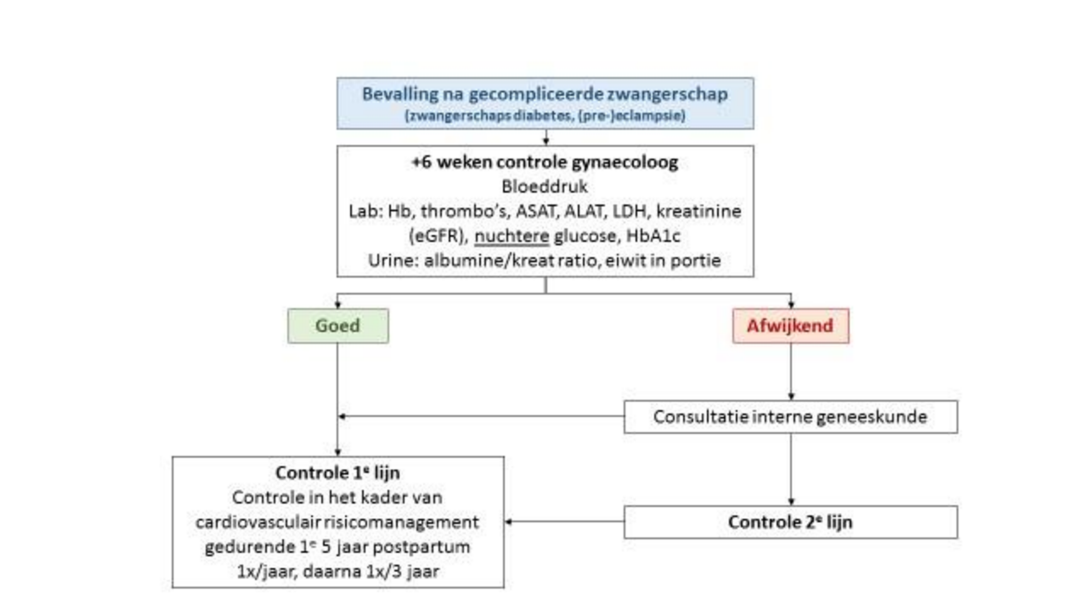

#### Uitgangspunten voor de behandeling in de tweede lijn

- Aanvullende onderzoeken om cardiovasculair risico in kaart te brengen. Zo nodig aanvullende diagnostiek
- Optimalisatie van de behandeling. Onder andere door aanpassing van de medicamenteuze en niet medicamenteuze therapie

#### Uitgangspunten voor terugverwijzing naar en follow-up in de eerste lijn

De gynaecoloog of internist-vasculair geneeskundige verwijst terug naar de huisarts als:

- Risicofactoren adequaat behandeld zijn (of geen beter resultaat bereikt kan worden).
- Een stabiele situatie is bereikt.

#### Informatieoverdracht bij verwijzing van de tweede naar de eerste lijn

- De huisarts ontvangt binnen 4 weken na het laatste polibezzoek een brief met de diagnose, alle diagnostische bevindingen en therapeutische interventies.

#### Controle in de eerste lijn

- Controle in het kader van CVRM gedurende vijf jaar postpartum ieder jaar en daarna één keer per drie jaar, tenzij er risicofactoren voor HVZ aanwezig zijn. In dat geval wordt de frequentie hoger, afhankelijk van de problematiek en het beloop.
- Consultatie of terugverwijzing naar de vasculair internist of cardioloog indien dit volgens de Multidisciplinaire richtlijn CVRM aan de orde is.

#### Deelproject B

In het kader van deelproject B (vrouwen die op basis van hun medische voorgeschiedenis in aanmerking komen voor CVRM hiervoor oproepen en includeren) worden de volgende taken onderscheiden in aanvulling op de taken voor project A:

**Dossiernummer 8223-21445****Hart voor Vrouwen in Den Haag**

1. Via koppeling van data (aansluiten bij de database van Haagse Vaten) risico stratificatie toepassen voor vrouwen met zwangerschapscomplicaties: nagaan welke complicaties in combinatie met welke andere factoren een verhoogd risico op HVZ geven en vanaf welke leeftijd. Op basis hiervan een indeling maken met welke frequentie de huisarts een vrouw zou moeten terugzien/ controleren (bijvoorbeeld vrouwen met een bepaalde etnische achtergrond of SES moeten mogelijk vaker gezien worden dan andere).



## 6. METHODS

### 6.1 Studie parameters/uitkomstmaten

#### 6.1.1 Primaire uitkomstmaat

- Hoeveel procent van de vrouwen die in aanmerking komen voor het integraal zorg- en preventie aanbod, krijgen dit aangeboden/ zijn in beeld (en blijven in beeld)?
- Hoeveel procent van de vrouwen die in aanmerking komen voor het integraal zorg- en preventie aanbod komen naar het eerste screenings moment (is een bloeddruk, , nuchter glucose, lipiden en nierfunctie gemeten)?
- Hoe wordt het integraal zorg- en preventie aanbod ontvangen en ervaren door de zorgprofessionals?
- Hoe wordt het integraal zorg- en preventie aanbod ontvangen en ervaren door de vrouwen die in aanmerking komen?

#### 6.1.2 Secondaire studie parameters/uitkomstmaten

- Wat zijn voor HVZ risico verhogende kenmerken binnen de groep vrouwen die vanwege hun voorgeschiedenis (in het verleden een hypertensieve aandoening in de zwangerschap of zwangerschapshypertensie) in aanmerking komen voor een integraal zorg- en preventie aanbod? En is dit anders dan voor vrouwen zonder deze voorgeschiedenis?

### 6.2 Studie procedures

#### Deelproject A

Voor de procesevaluatie van het integraal zorg- en preventie aanbod zal gebruik worden gemaakt van semigestructureerde interviews om de ervaringen van de stakeholders (zorgprofessionals en vrouwen) in beeld te brengen.

#### Semigestructureerd interviews:

Interviews zijn van belang om achtergronden van de perceptie en mening van belangrijke stakeholders te achterhalen (DiCicco-Bloom & Crabtree, 2006). Er zullen individuele face-to-face diepte-interviews (n=30-35) worden gehouden met de betrokken zorgprofessionals en vrouwen. Middels 'snowball-sampling' kunnen belangrijke (soms minder gehoorde) actoren en perspectieven worden meegenomen. De interviews bieden een breed inzicht in de perspectieven en meningen rond het 'integraal zorg- en preventie aanbod'. De semigestructureerd interviews worden met toestemming van de geïnterviewden opgenomen.

#### Deelproject B

Via koppeling van data (aansluiten bij de database van Haagse Vaten) zal risico stratificatie toegepast voor vrouwen met zwangerschapshypertensie, pre-eclampsie of diabetes gravidarum: nagaan welke complicaties in combinatie met welke andere

**Dossiernummer 8223-21445****Hart voor Vrouwen in Den Haag**

(medisch en sociale) factoren een verhoogd risico op HVZ geven en vanaf welke leeftijd. Op basis hiervan zal een indeling gemaakt worden met welke frequentie de huisarts een vrouw zou moeten terugzien/ controleren (bijvoorbeeld vrouwen met een bepaalde etnische achtergrond, combinatie van aandoeningen of SES moeten mogelijk vaker gezien worden dan andere).

Voor deze risico stratificatie zal gebruikgemaakt worden van de ELAN GGDH data infrastructuur. Meer concreet, gegevens van zowel huisartsenzorg, ziekenhuiszorg, geestelijke gezondheidszorg, gemeente als zorgverzekeraars zijn binnen deze data-infrastructuur geüpload naar de beveiligde omgeving van CBS. Het CBS koppelt deze data vervolgens aan de Basisregistratie Personen en pseudonimiseert vervolgens deze gegevens door de koppelsleutel (combinatie van volledige geboortedatum, zescijferige postcode en geslacht) te vervangen door Random Identification Nummer (RIN). Na het 'verrinnen' worden deze gegevens ter beschikking gesteld aan de onderzoekers van de LUMC Campus Den Haag. De gepseudonimiseerde dataset wordt verder verrijkt met bestaande CBS-gegevens (wijk- en buurt\_id, huishoudsamenstelling, etniciteit, inkomen, schulden, huishoudsamenstelling, doodsoorzaken, plaats van overlijden). Voor ELAN GGDH is een breed juridisch draagvlak geborgd binnen de mogelijkheden van de AVG. Het CBS geeft vervolgens een RIN waarna de verrinde gegevens in de beveiligde omgeving van het CBS ter beschikking wordt gesteld aan de onderzoekers. De dataset wordt verrijkt met gegevens zoals deze binnen het regionale bestuurlijk overleg GG-DH reeds beschikbaar zijn voor 2007-2017 van 1,1 miljoen inwoners van de regio Haaglanden, waarvan ~50% vrouw. Voor gedetailleerde informatie over de wet op het CBS en de mogelijke koppelingen verwijzen wij naar de documenten van het CBS; <https://www.cbs.nl/nl-nl/onze-diensten/maatwerk-en-microdata/microdata-zelf-onderzoek-doen>).

## 7. STATISTICAL ANALYSIS

Er wordt gebruik gemaakt van beschrijvende statistiek voor de beschrijving van de risicoprofielen en gezondheidsuitkomsten.

### 7.1 Deelproject A: semi-gestructureerde interviews

Semi-gestructureerde interviews behoren tot het domein van kwalitatief onderzoek. Deze gesprekken geven de mogelijkheid om op gestructureerde wijze de gedachte en mening van iemand over een onderwerp te bevragen. Bij alle gesprekken zal getracht worden dezelfde interviewer aanwezig te laten zijn

Het transcript verkregen uit de verschillende semi-gestructureerde interviews zullen in een open coderingsfase onafhankelijk worden geanalyseerd door twee onderzoekers. Het gaat dan om het coderen van fragmenten die van betekenis kunnen zijn voor het beantwoorden van de vraagstelling. Consensus en inter-coder agreement worden verkregen door het analyseren en bediscussiëren van de codes door de twee onderzoekers. Bij gebrek aan consensus zal een derde onderzoeker worden gevraagd om te bemiddelen tot consensus is bereikt. De volgende fase, de axiale codering, zal worden gebruikt om te zoeken naar relaties tussen codes. Zo nodig worden in deze fase nieuwe codes ontwikkeld of samengevoegd. Uiteindelijk worden de codes gegroepeerd in categorieën en uiteindelijk in thema's verdeeld waarbij gekeken zal worden naar verschillen en overeenkomsten tussen vrouwen en mannen. Dit zal gedaan worden zowel voor de factoren die het moeilijk maken om te stoppen met roken of juist helpen, als in mogelijke interventies, te betrekken zorgverleners en betrokkenheid vanuit de deelnemers zelf.

De software die gebruikt wordt is Atlas.ti, versie 7.5.18.

### 7.2 Deelproject B: Risico stratificatie

Voor risico-inschatting en vergelijking van de risico's voor HVZ risico verhogende kenmerken wordt gebruik gemaakt multilevel analyse. Eerst worden de uitkomsten en medische en sociale determinanten onderzocht middels single-level analyse door middel van logistische (dichotome uitkomsten) of lineaire (numerieke uitkomsten) regressie. Vervolgens worden de modellen samengevoegd in een multi-level regressiemodel waarop verschillende risicogroepen bepaald kunnen worden.

## 8. ETHICAL CONSIDERATIONS

### 8.1 Regulation statement

The proposed study will be conducted in full compliance with national and international standards and regulations. We will comply with the standards of the World Medical Association Declaration of Helsinki – Ethical Principles for Medical Research Involving Human Subjects, last amended October 2013. In addition, we will comply with the Charter of Fundamental Rights of the European Union and the EU Directive 95/46/EC.

### 8.2 Recruitment en consent

Alle huisartsenpraktijken in de regio zullen via het verbeterde verwijfs proces geattendeerd worden op het verhoogd cardiovasculair risico van vrouwen die in 2021 zijn bevallen. Daarnaast gaan we in 15 huisartsenpraktijken vrouwen die in het verleden een hypertensieve aandoening in de zwangerschap hebben doorgemaakt, opsporen en oproepen (door de huisarts) zodat ook hen een passend preventie- en zorgaanbod kan worden aangeboden.

**Dossiernummer 8223-21445****Hart voor Vrouwen in Den Haag**

---

**9. ADMINISTRATIVE ASPECTS, MONITORING AND PUBLICATION****9.1 Handling and storage of data and documents**

De opgenomen gesprekken zullen beveiligd worden opgeslagen en de uitgewerkte teksten worden op de beveiligde I-schijf van het LUMC opgeslagen gedurende 15 jaar.

**9.2 Amendments**

Substantiële wijzigingen zullen via een amendement aan de METC worden voorgelegd.

**9.3 Public disclosure and publication policy**

De bevindingen zullen gepubliceerd worden in peer reviewed journals.

## 10. REFERENCES

1. Bellamy L, Casas JP, Hingorani AD, Williams DJ. Pre-eclampsia and risk of cardiovascular disease and cancer in later life: systematic review and meta-analysis. *BMJ*. 2007 Nov 10;335(7627):974.
2. De juiste zorg op de juiste plek: <https://www.dejuistezorgopdejuisteplek.nl/>
3. Engeland A, Bjørge T, Daltveit AK, Skurtveit S, Vangen S, Vollset SE, Furu K. Risk of diabetes after gestational diabetes and preeclampsia. A registry-based study of 230,000 women in Norway. *Eur J Epidemiol*. 2011 Feb;26(2):157-63. doi: 10.1007/s10654-010-9527-4. Epub 2011 Feb 6.
4. Gender en preventie. Een eerste inventarisatie:  
<https://publicaties.zonmw.nl/fileadmin/zonmw/documenten/Preventie/>
5. Gender\_en\_preventie.\_Een\_eerste\_inventarisatie.pdf
6. Gladstone RA, Pudwell J, Nerenberg KA, Grover SA, Smith GN. Cardiovascular Risk Assessment and Follow-Up of Women After Hypertensive Disorders of Pregnancy: A Prospective Cohort Study. *J Obstet Gynaecol Can*. 2019 Jan 14. pii: S1701-2163(18)30836-3. doi: 10.1016/j.jogc.2018.10.024.
7. Van Leeuwen M, Prins SM, de Valk HW, Evers IM, Visser GHA en Mol BWJ. Diabetes gravidarum. Behandeling vermindert kans op complicaties. *Ned Tijdschr Geneeskd*. 2011;155:A2291
8. Lykke JA, Langhoff-Roos J, Lockwood CJ, Triche EW, Paidas MJ. Mortality of mothers from cardiovascular and non-cardiovascular causes following pregnancy complications in first delivery. *Paediatr Perinat Epidemiol*. 2010 Jul 1;24(4):323-30. doi: 10.1111/j.1365-3016.2010.01120.x.
9. Maas A. Hartklachten vrouwen apart definiëren. *Medisch Contact* 2011.  
<https://www.medischcontact.nl/nieuws/laatste-nieuws/>
10. <artikel/angela-maas-hartklachten-vrouwen-apart-definieren.htm>
11. Multidisciplinaire richtlijn Cardiovasculair risicomanagement (MDR CVRM) 2019  
<https://www.nhg.org/?q=actueel/nieuws/multidisciplinaire-richtlijn-cvrm-herzien>
12. Nationale Wetenschapsagenda: <https://vragen.wetenschapsagenda.nl/cluster/>
13. hoe-kunnen-we-hart-en-vaatziekten-atherosclerose-hartfalen-hartritme%C2%ADstoornissen-en-trombose
14. NVOG-richtlijn Cardiovasculair Risicomanagement na een reproductieve aandoening.  
[https://www.nvog.nl/wp-content/uploads/](https://www.nvog.nl/wp-content/uploads/2017/12/Cardiovasculair-risicomanagement-na-een-reproductieve-aandoening-1.0-13-11-2014.pdf)
15. [2017/12/Cardiovasculair-risicomanagement-na-een-reproductieve-aandoening-1.0-13-11-2014.pdf](https://www.nvog.nl/wp-content/uploads/2017/12/Cardiovasculair-risicomanagement-na-een-reproductieve-aandoening-1.0-13-11-2014.pdf)
16. NVOG-richtlijn Hypertensieve aandoeningen in de zwangerschap, 2014
17. NVOG richtlijn Diabetes Mellitus en Zwangerschap, 2018
18. Steegers EA, von Dadelszen P, Duvekot JJ, Pijnenborg R. Pre-eclampsia. *Lancet*. 2010 Aug 21;376(9741):631-44. doi: 10.1016/S0140-6736(10)60279-6.
19. Verdonk K, Visser W, Steegers EAP, Kappers MHW, Danser AHJ en van den Meiracker AH. De rol van angiogeneseremmende factoren. Nieuwe inzichten in pathogenese van pre-eclampsie. *Ned Tijdschr Geneeskd*. 2011;155:A2946

**Dossiernummer 8223-21445****Hart voor Vrouwen in Den Haag**

20. Wilson BJ, Watson MS, Prescott GJ, Sunderland S, Campbell DM, Hannaford P, Smith WC. Hypertensive diseases of pregnancy and risk of hypertension and stroke in later life: results from cohort study. *BMJ*. 2003 Apr 19;326(7394):845
